# Supplementary material for: Japanese Encephalitis Virus Disrupts Cell-Cell Junctions and Affects the Epithelial Permeability Barrier Functions
Source: PubMed Central journal article supplement (PMC3722119; doi:10.1371/journal.pone.0069465), 2013-07-24

**Figure S2A:**

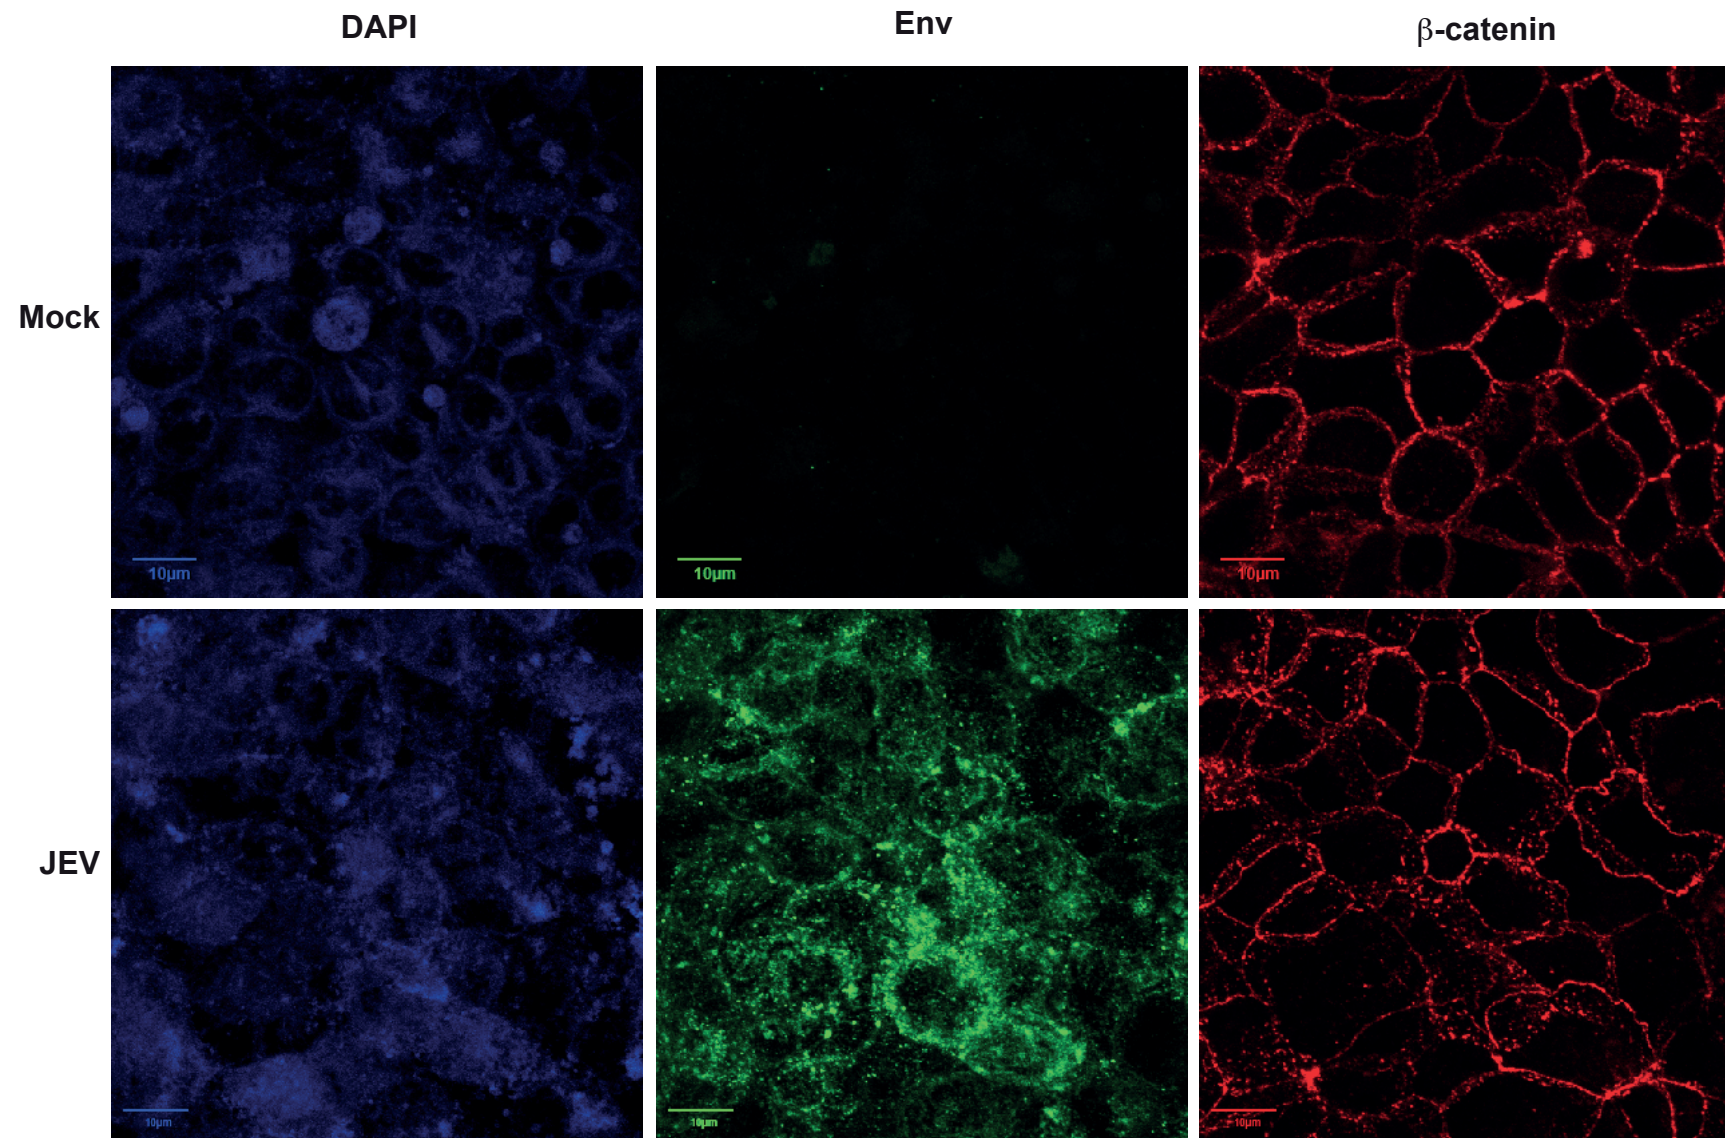



**Figure S2B:**

**DAPI**

**Env**

**Occludin**

**Mock**

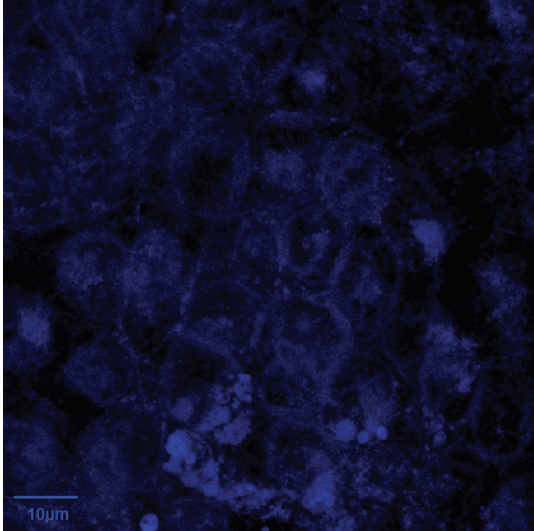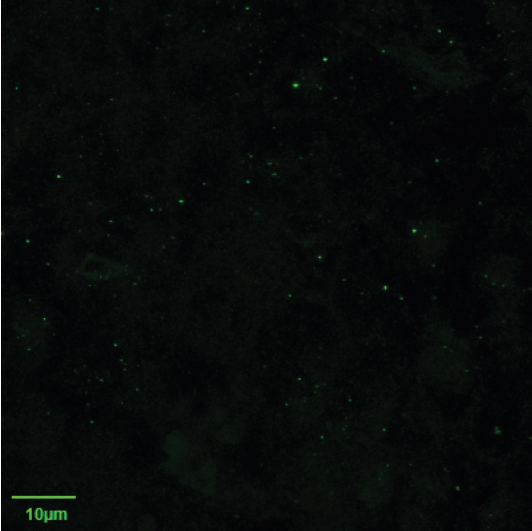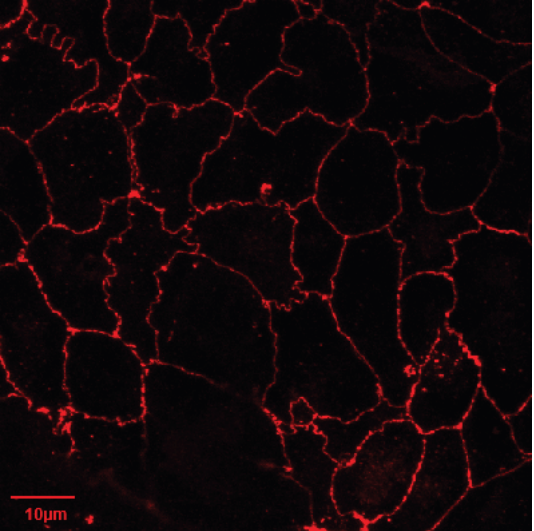

**JEV**

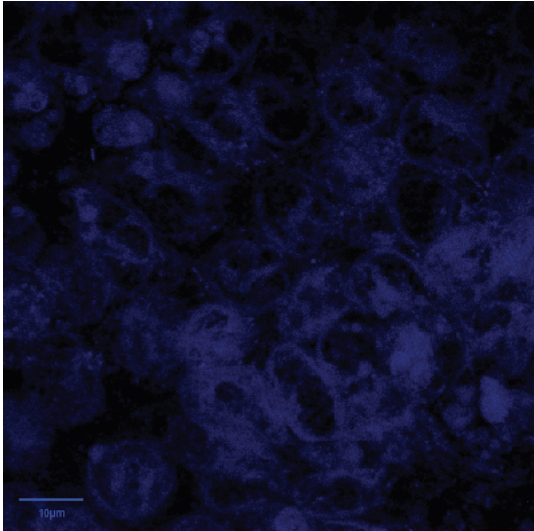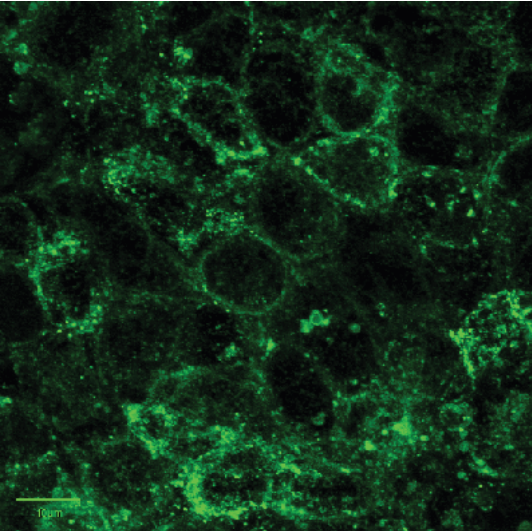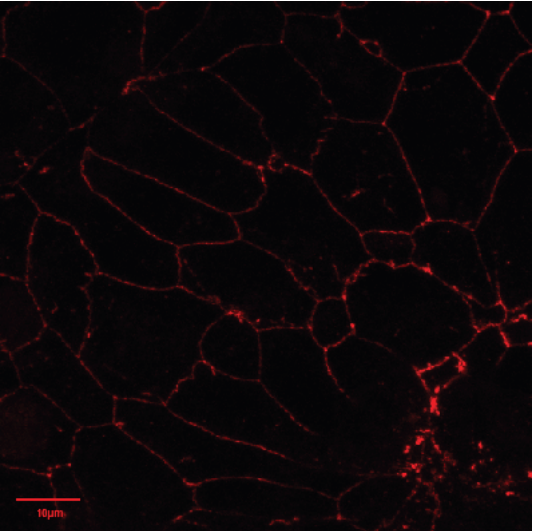



**Figure S2C:**

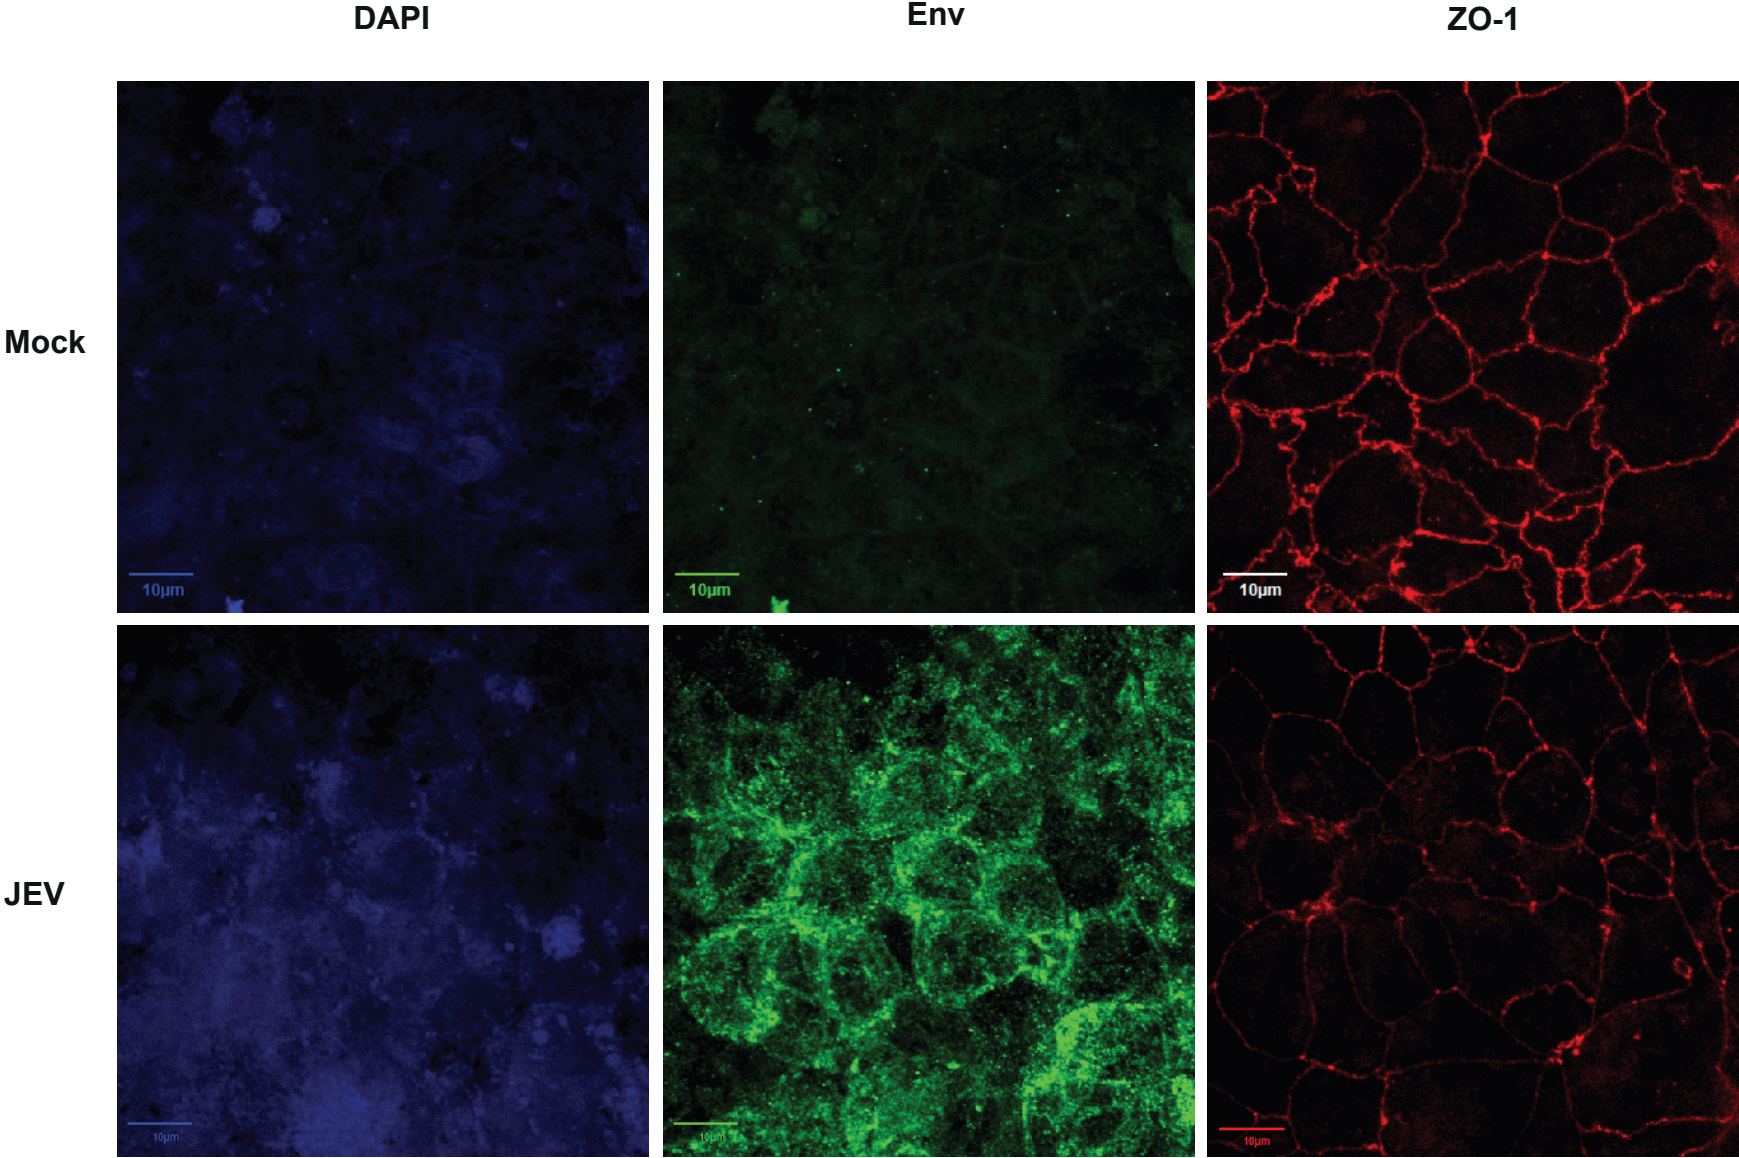

Supplement: pone.0069465.s002.pdf [file pone.0069465.s002.pdf]
